# Supplementary material for: Sedimentary microplankton distributions are shaped by oceanographically connected areas
Source: Copernicus journal article supplement (doi:10.5194/esd-2021-48), 2021-08-24
Supplement: Supplementary file 1 [file esd-2021-48-supplement.pdf]

# Supporting Information for ‘Sedimentary microplankton distributions are shaped by oceanographically connected areas’

Peter D. Nooteboom<sup>1,2</sup>, Peter K. Bijl<sup>3</sup>, Christian Kehl <sup>1</sup>, Erik van Sebille<sup>1,2</sup>,

Martin Ziegler <sup>3</sup>, Anna S. von der Heydt<sup>1,2</sup>and Henk A. Dijkstra<sup>1,2</sup>

<sup>1</sup>Institute for Marine and Atmospheric Research Utrecht (IMAU), Utrecht University

<sup>2</sup>Centre for Complex Systems Studies, Utrecht University

<sup>3</sup>Marine Palynology and Paleoceanography, Laboratory of Palaeobotany and Palynology, Utrecht University

## Contents of this file

1. Figures S1 to S14

---

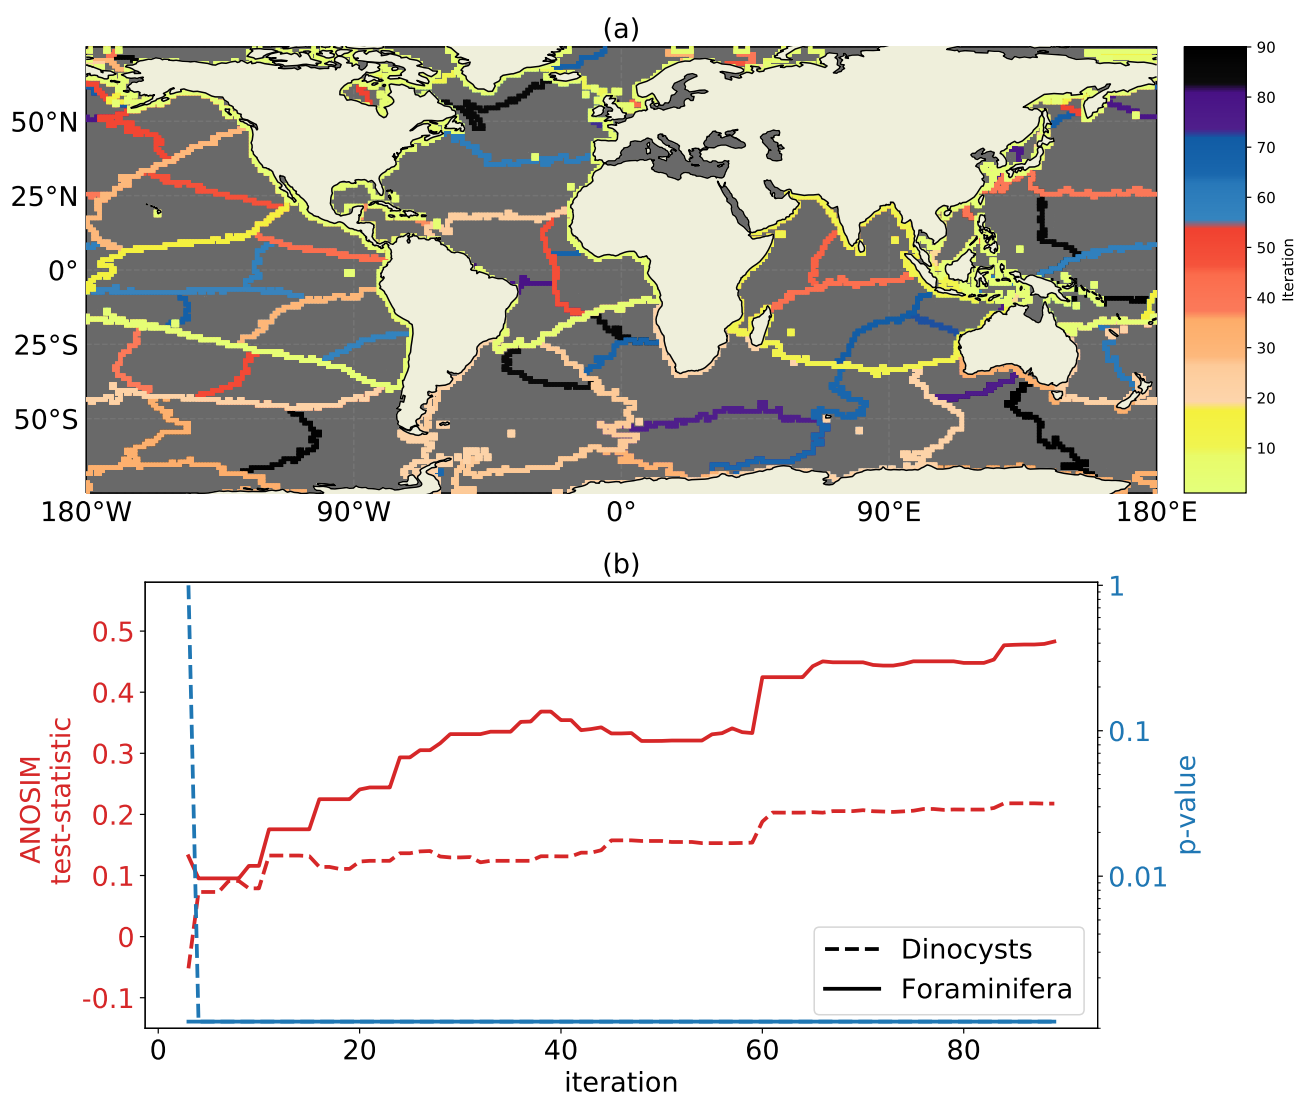

**Figure S1.** Same as figure 2, but with  $11 \text{ m day}^{-1}$  sinking speed.

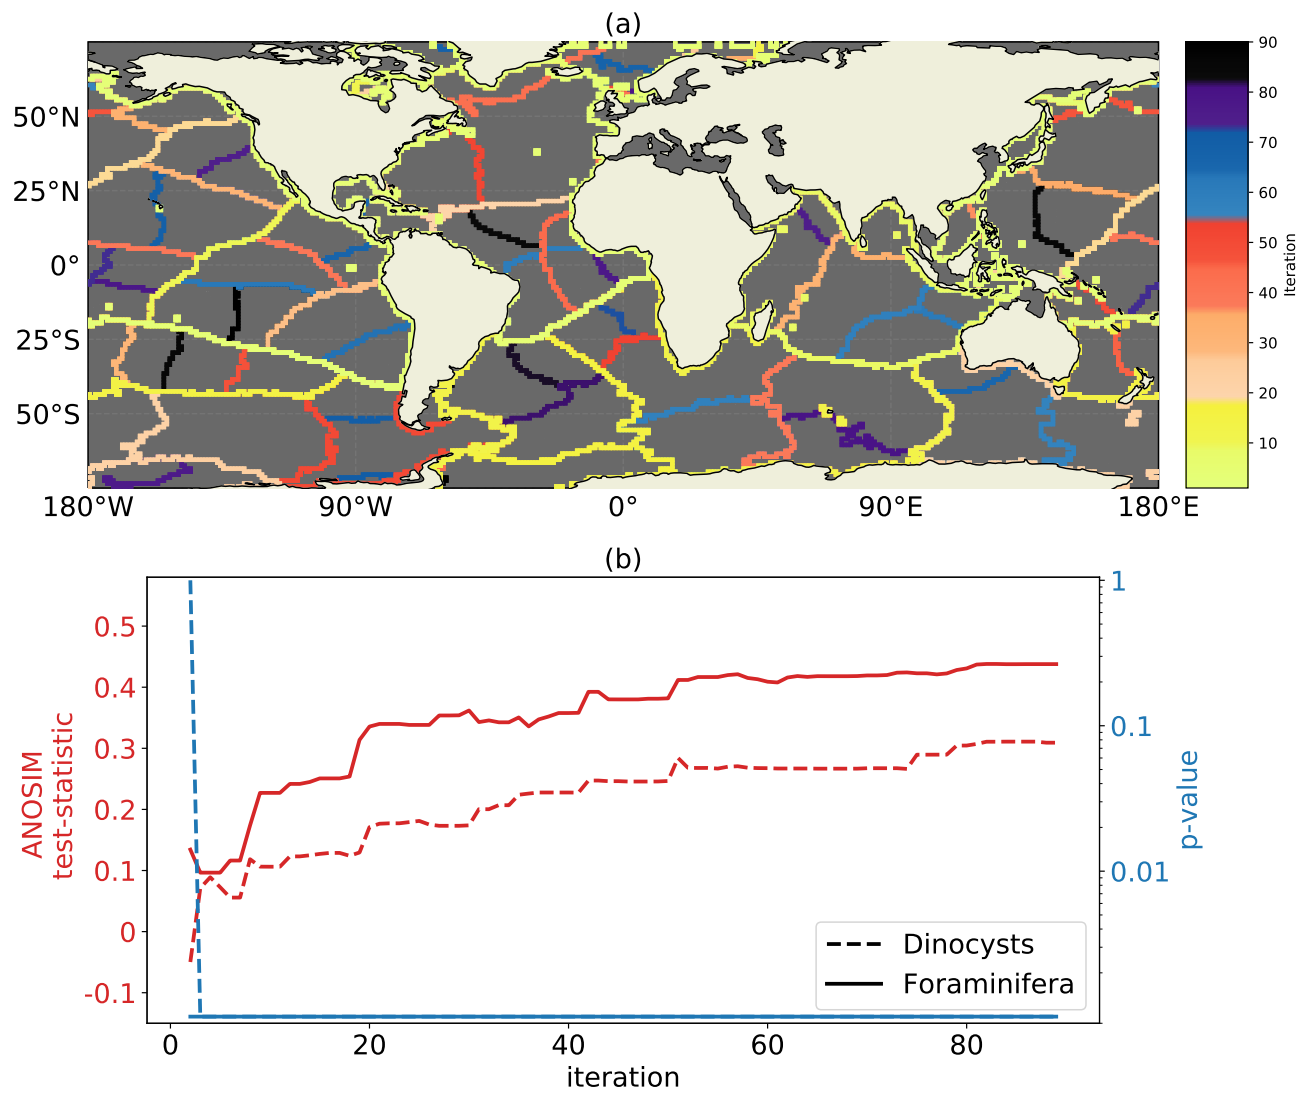

**Figure S2.** Same as figure 2, but with  $25 \text{ m day}^{-1}$  sinking speed.

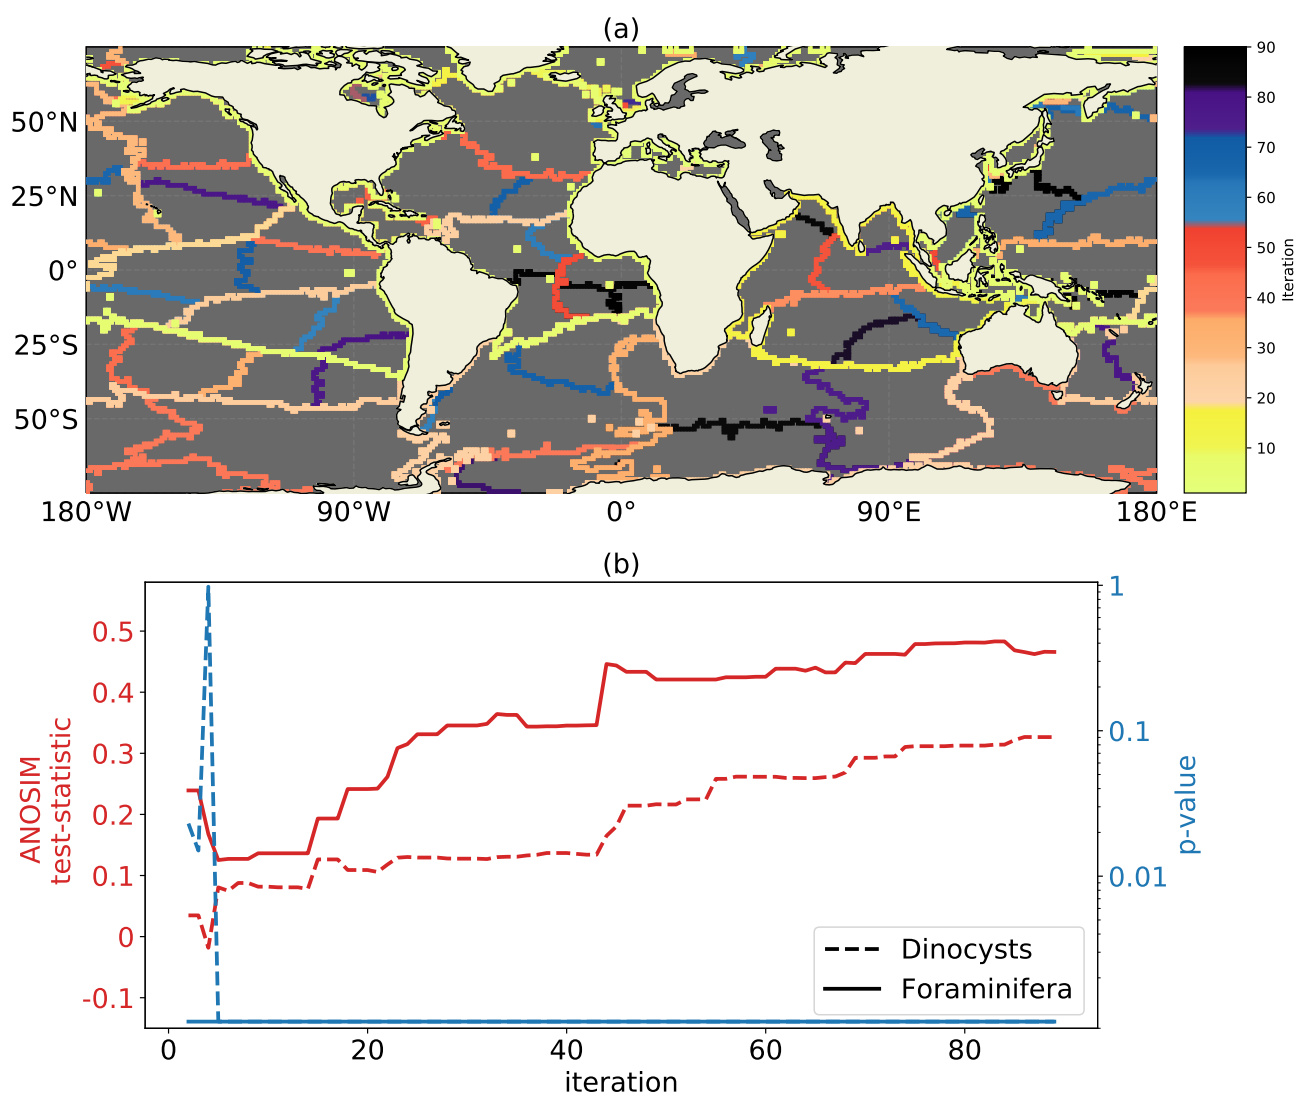

**Figure S3.** Same as figure 2, but if only particles are used that started sinking in summer.



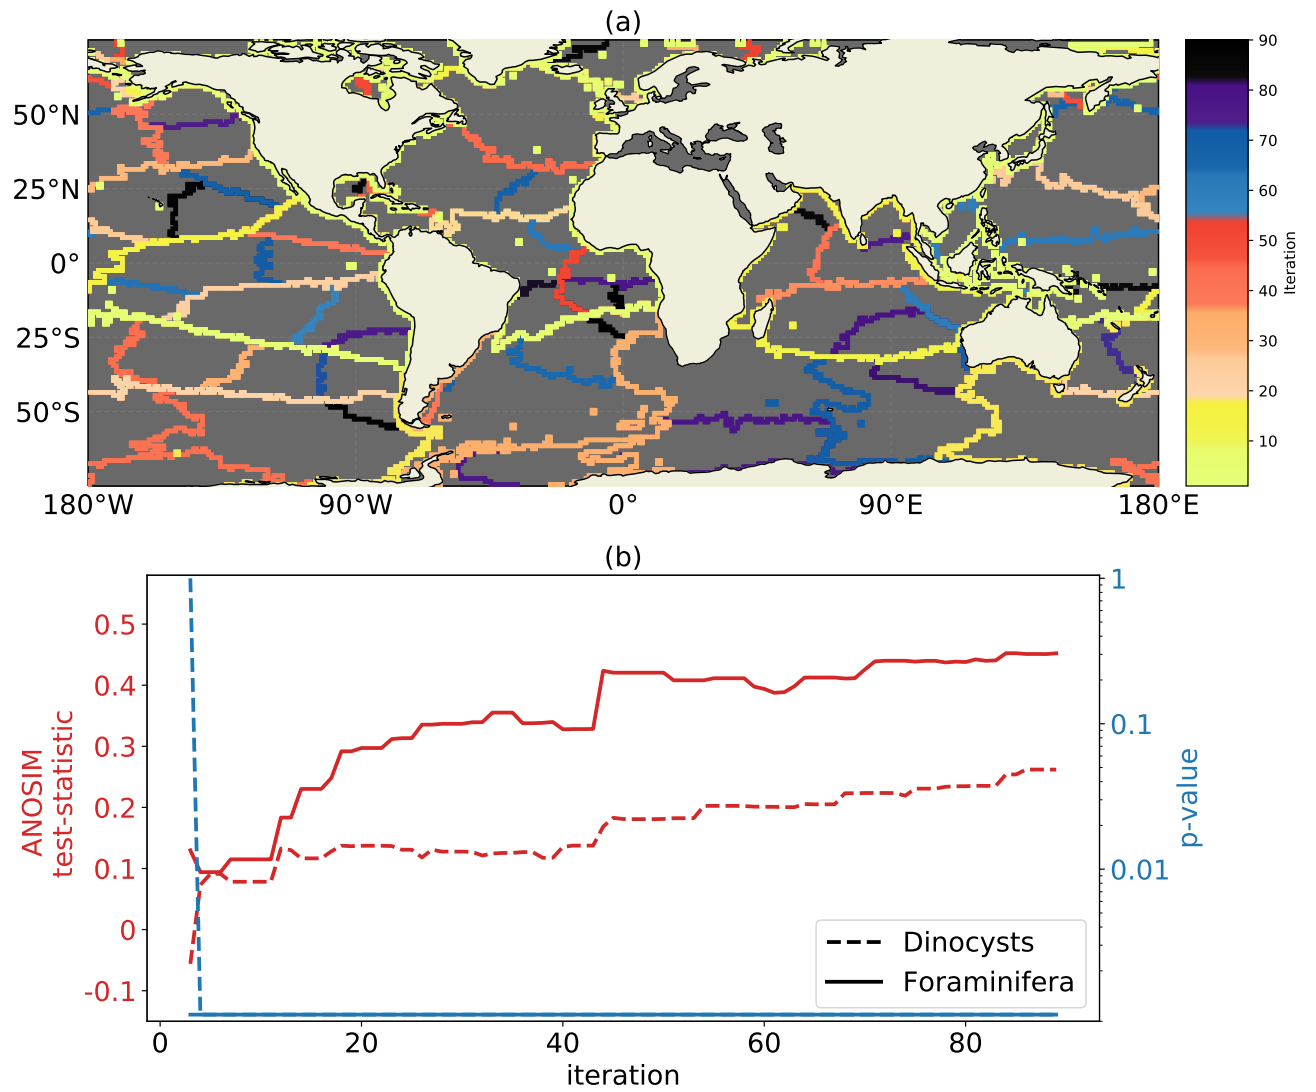

**Figure S4.** Same as figure 2, but if only particles are used that started sinking in winter.

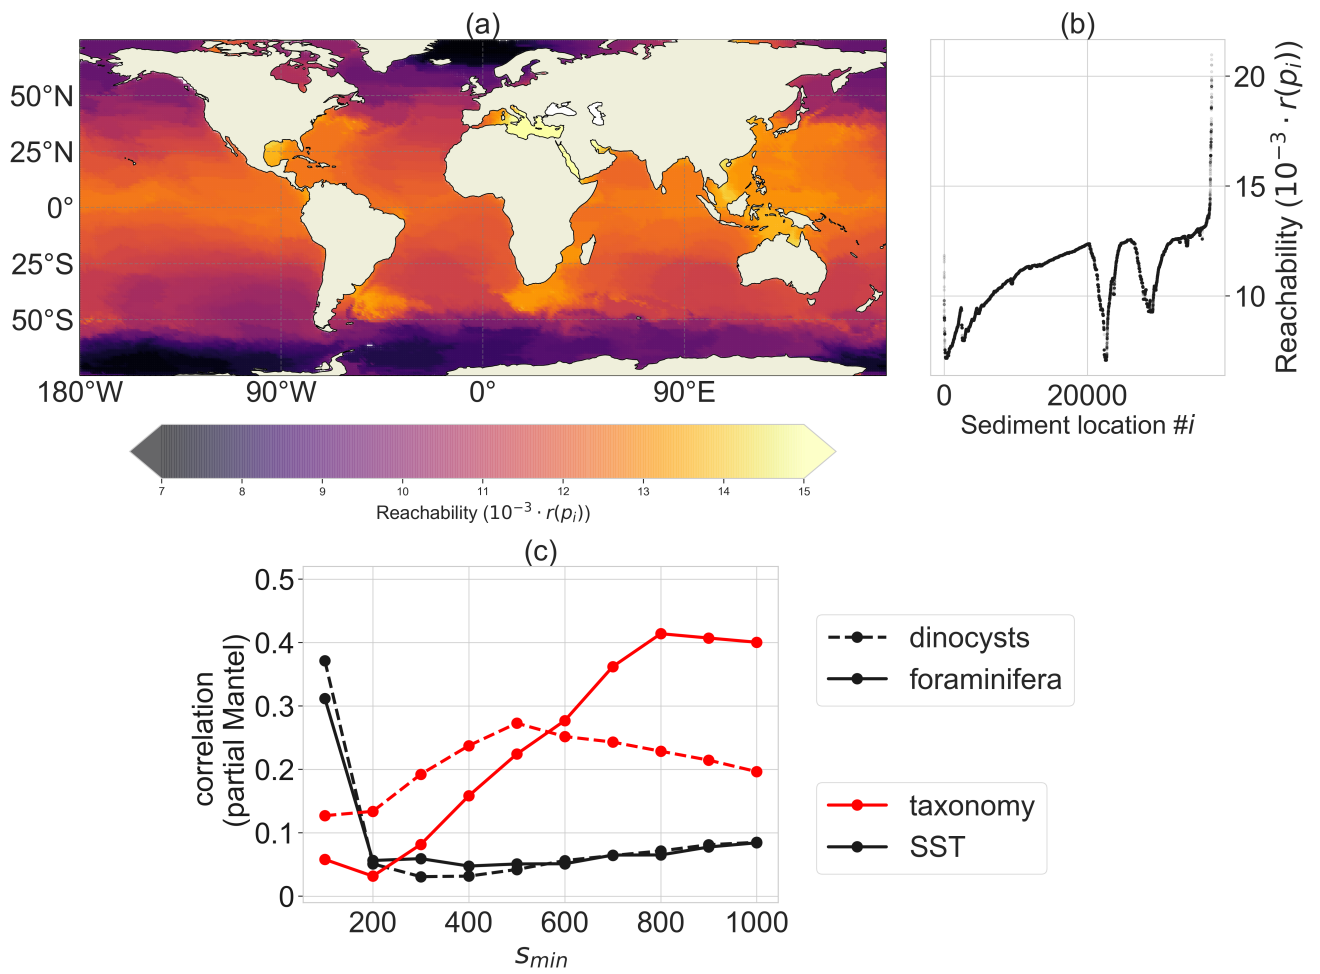

**Figure S5.** Same as figure 3, but with  $11 \text{ m day}^{-1}$  sinking speed.

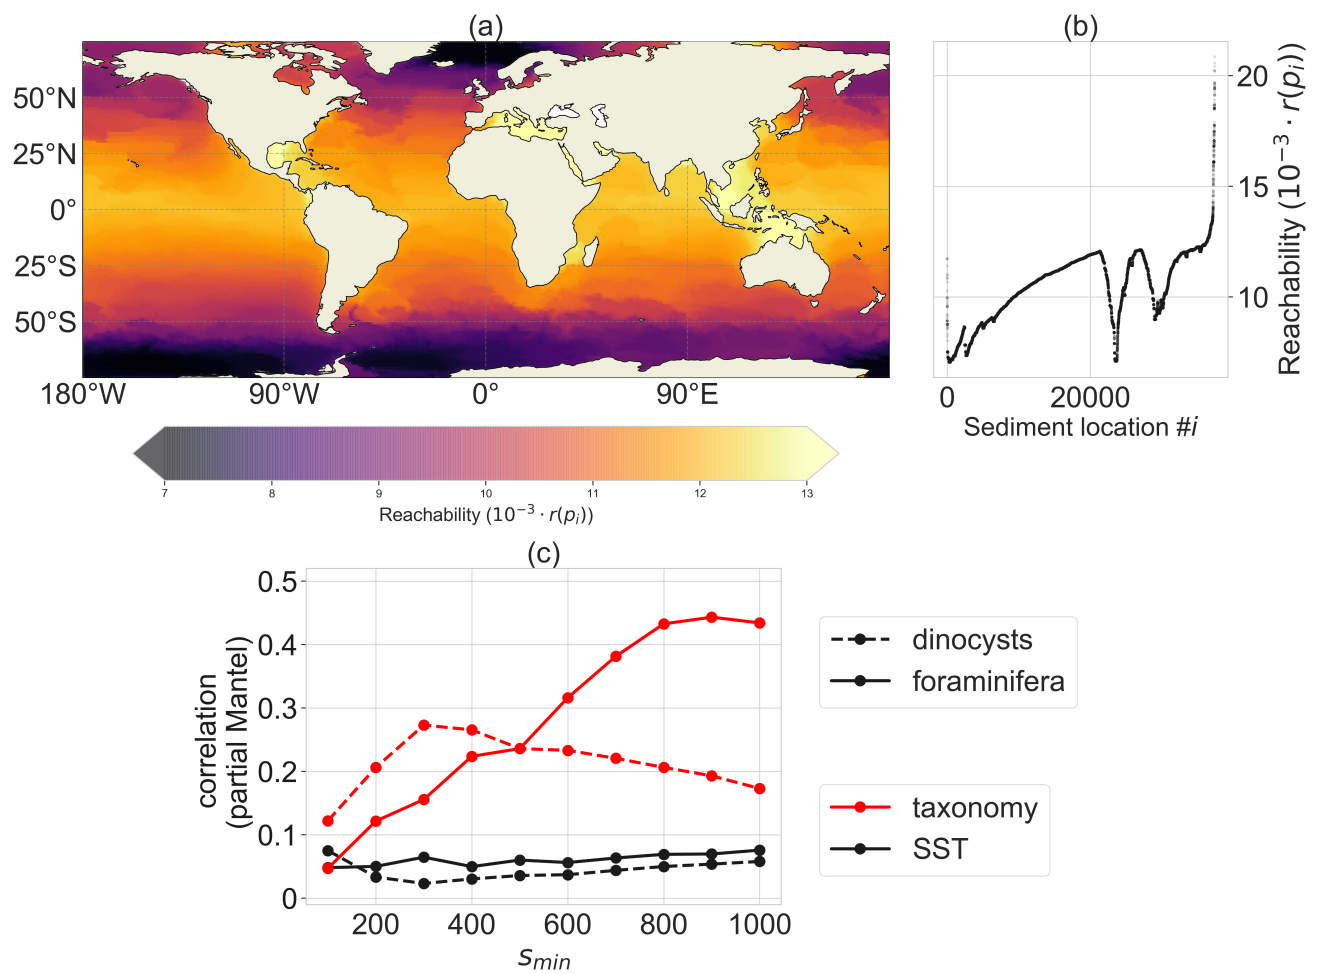

**Figure S6.** Same as figure 3, but with  $25 \text{ m day}^{-1}$  sinking speed.

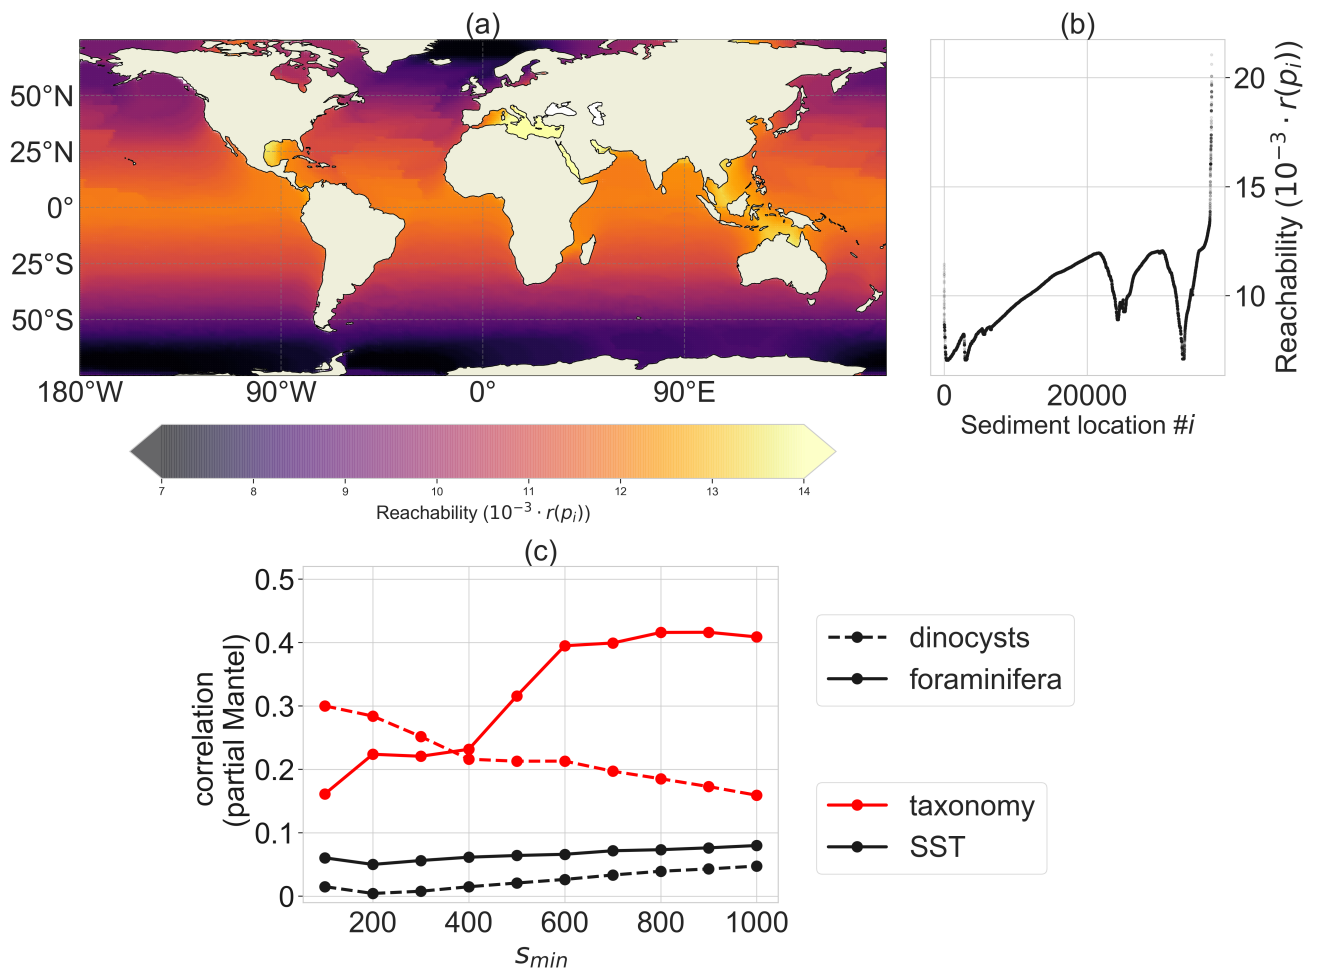

**Figure S7.** Same as figure 3, but with  $250 \text{ m day}^{-1}$  sinking speed.

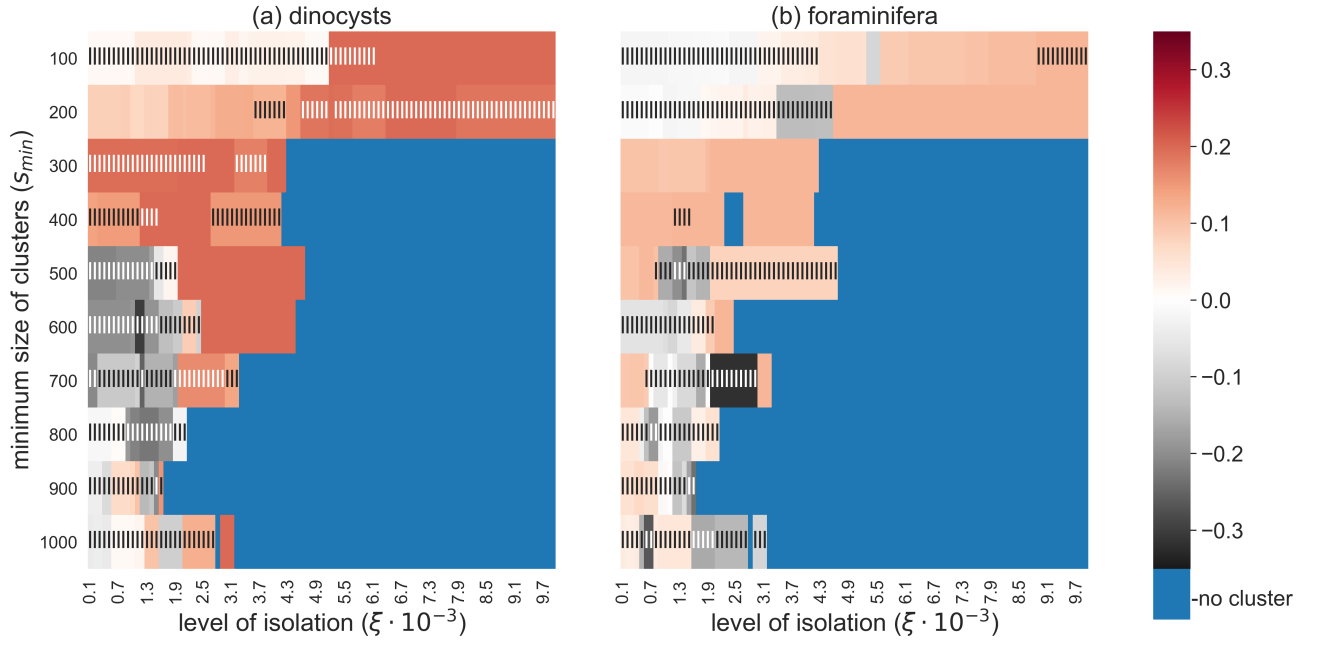

**Figure S8.** Same as figure 6, but with  $11 \text{ m day}^{-1}$  sinking speed.

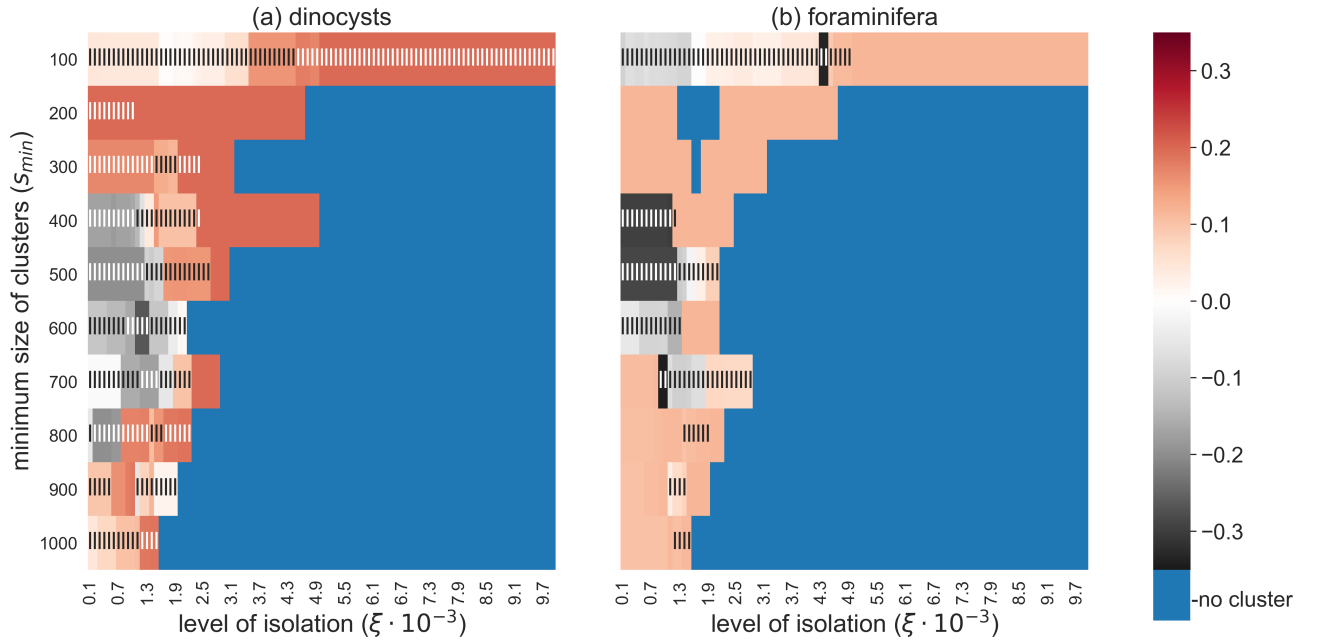

**Figure S9.** Same as figure 6, but with  $25 \text{ m day}^{-1}$  sinking speed.

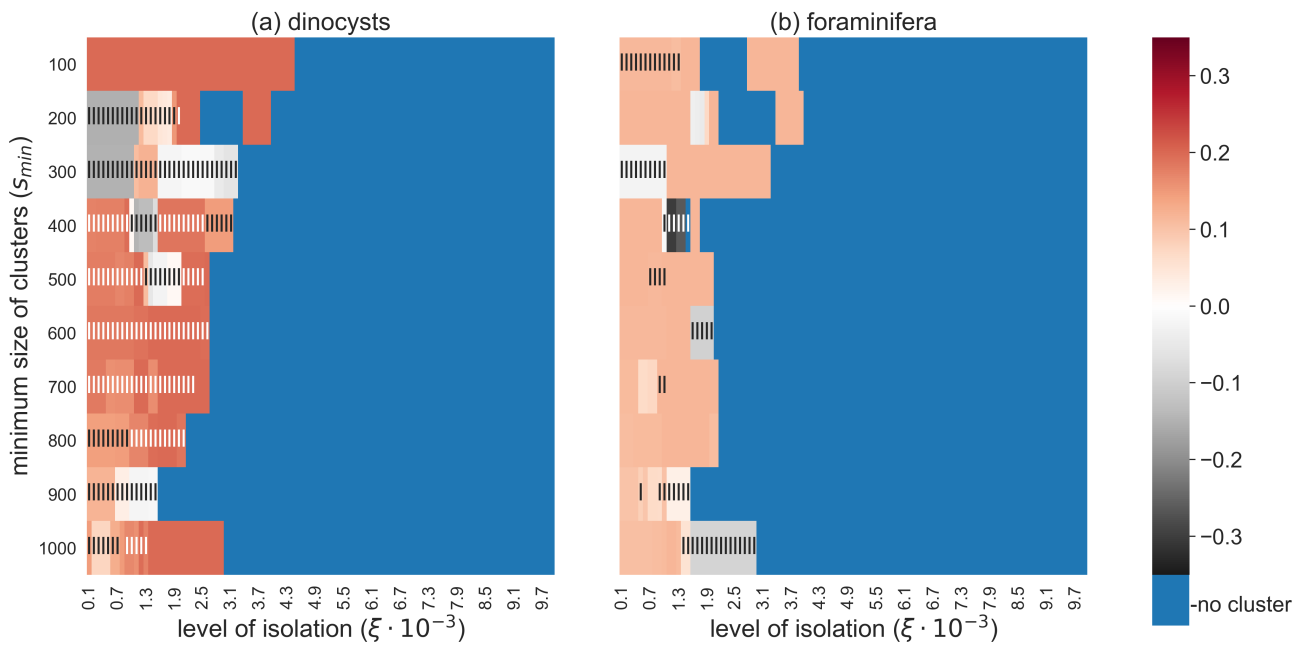

**Figure S10.** Same as figure 6, but with  $250 \text{ m day}^{-1}$  sinking speed.

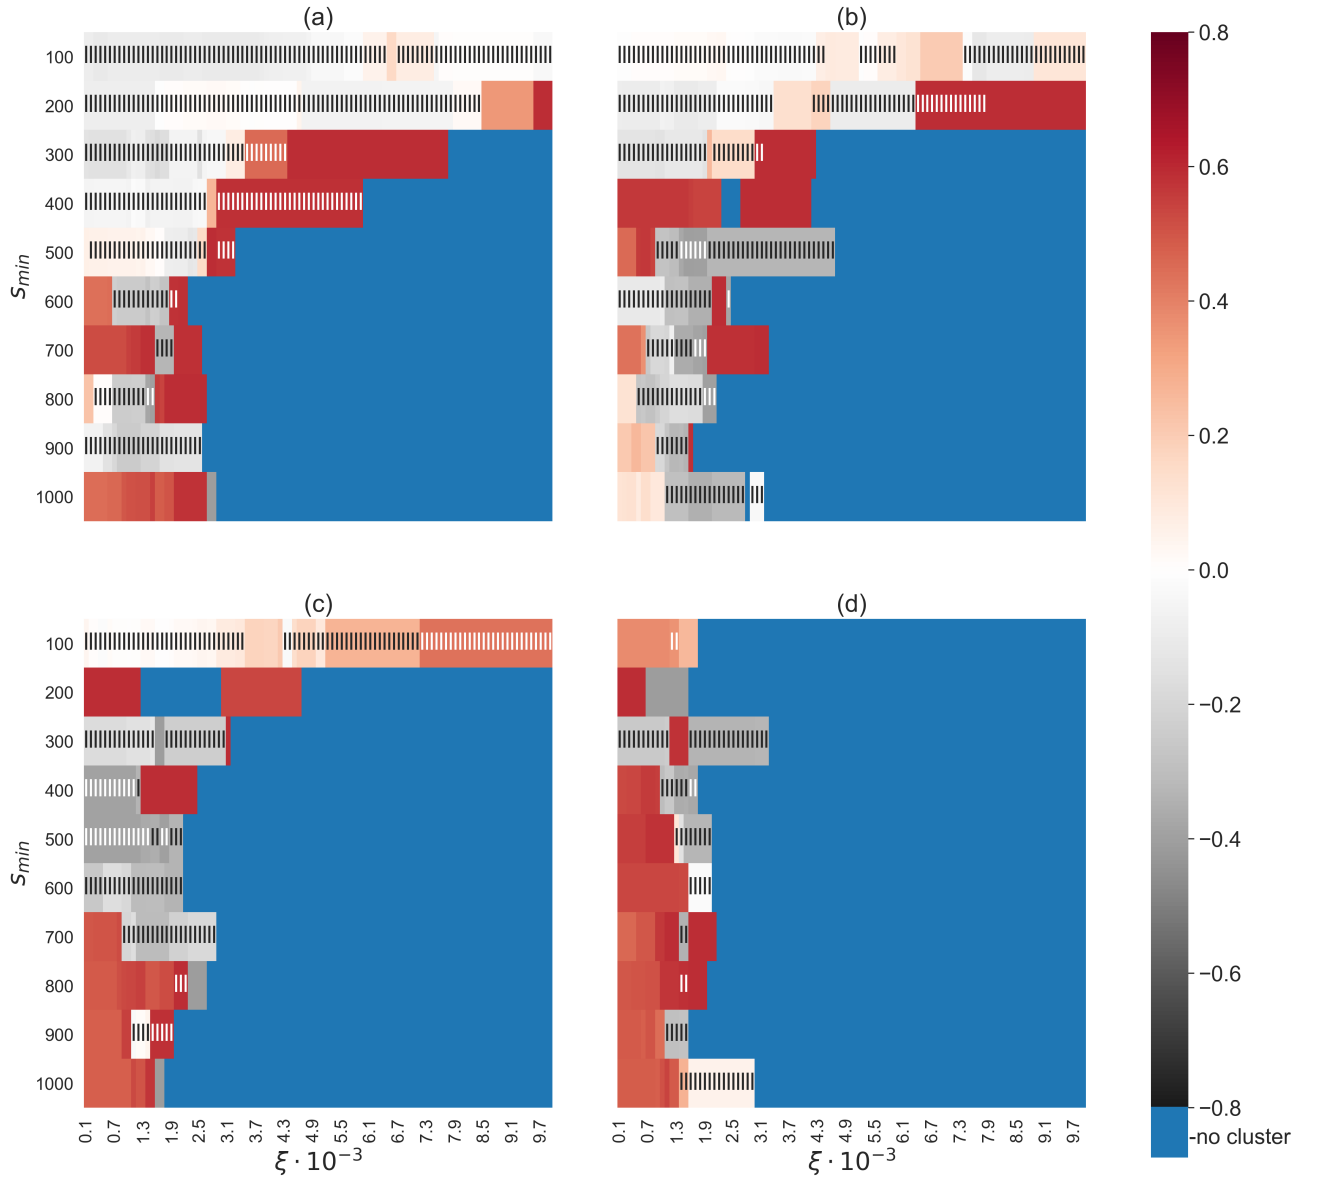

**Figure S11.** Same as figure 6b, but if only the near-surface dwelling foraminifera species are used, and for (a) 6 m day<sup>-1</sup> (b) 11 m day<sup>-1</sup> (c) 25 m day<sup>-1</sup> (d) 250 m day<sup>-1</sup> sinking speed. The CCA analyses lead to significant results for fewer combinations of  $\xi$  and  $s_{min}$ , but the increase of CCA variance is higher if it is significant, compared to the case where the full ForCens dataset is used.

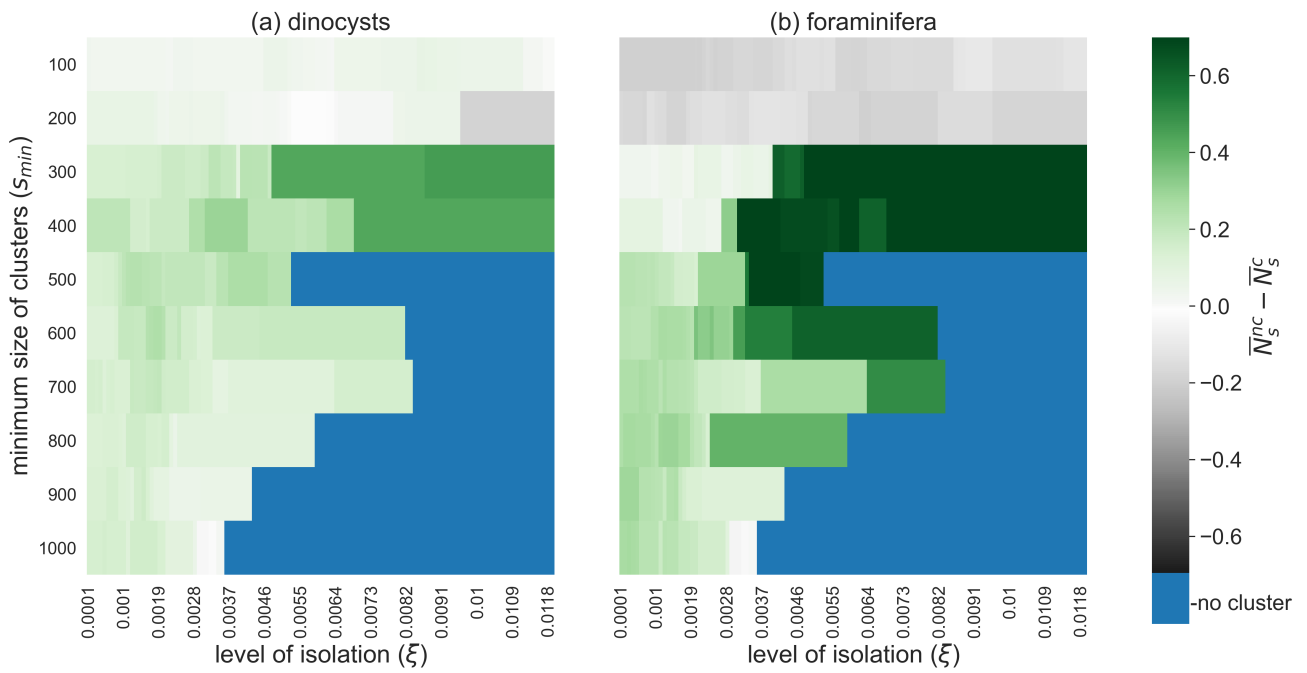

**Figure S12.** Same as figure 7, but with 11 m day<sup>-1</sup> sinking speed.

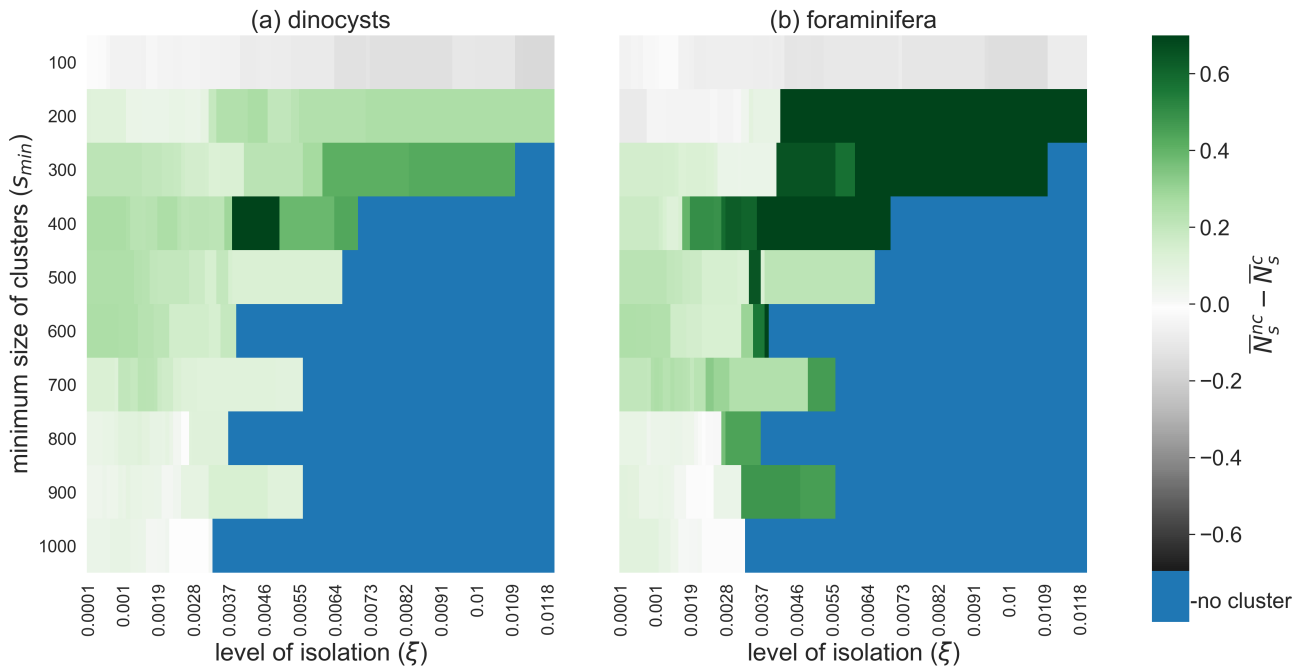

**Figure S13.** Same as figure 7, but with 25 m day<sup>-1</sup> sinking speed.



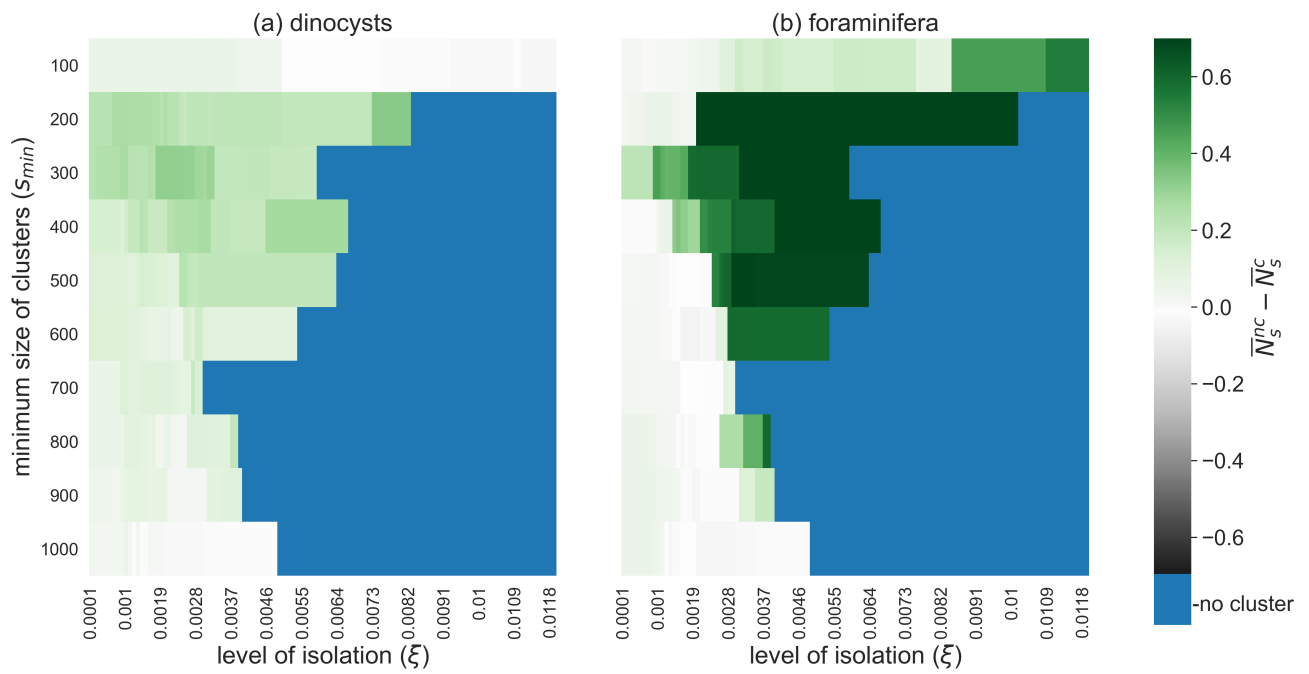

**Figure S14.** Same as figure 7, but with  $250 \text{ m day}^{-1}$  sinking speed.
